# Supplementary material
Source: Springer Nature journal article supplement (https://www.springermedizin.de/resource/supplementary/12958_2011_949_MOESM1_ESM.pdf/9566452)
Supplement: MOESM1 [file 9566452]

# Study Design

GnRH antagonist protocol  
Endometrial biopsies (Endo Bx)

Day of IVF Retrieval  
(Endo Bx: CD 14)  
n=16

No luteal Support

Progesterone

Progesterone + Estrogen

Endo Bx: CD 17, 19, 24  
n=4

Endo Bx: CD 17, 19, 24  
n=4

Endo Bx: CD 17, 19, 24  
n=4
